# Supplementary material
Source: MDPI journal article supplement (https://www.mdpi.com/2072-4292/7/9/11163)
Supplement: s1 [file s1]

**Supplementary Information**

**1. Social-economic Environment in Study Region**

The study area is located in Northwest China, covering 41 counties of three provincial units including Shaanxi, Gansu and Ningxia, with an area of 13.8 × 104 km2 and elevations ranging from 503 to 2500 m. Geographically, it lies between 105°E–110°E and 35°N–40°N (Figure S1). The population density in 1999 reached 73 person/km2 [1]. The sixth national census statistics in 2010 shows that the density of population was reduced to 71 person/km2, which was also higher than the threshold of resident population (20 person/km2) suggested by the United Nations in arid and semi-arid zones. In addition, the population density is increasing in Yan’an and Yulin (Table S1). This has placed a huge pressure on the fragile local ecosystems and natural resources[2].


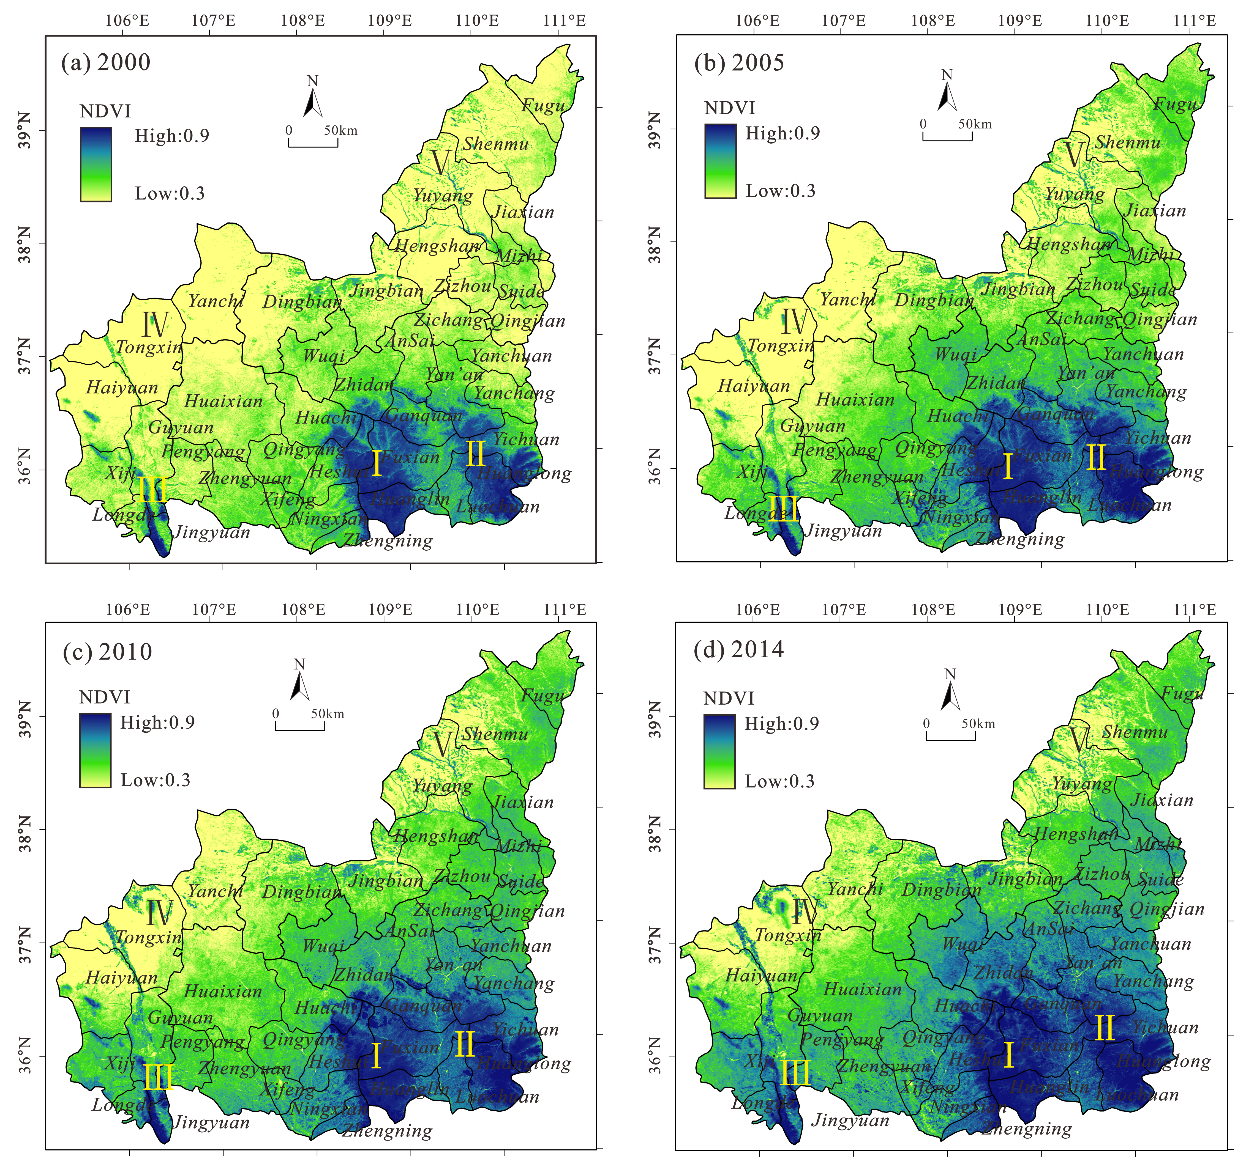


**Figure 1.** Spatial pattern of NDVI in Shaanxi-Gansu-Ningxia Region in 2000 (**a**); 2005 (**b**); 2010 (**c**) and 2014 (**d**).

**Table S1.** The composition of villages and towns in the Shaanxi-Gansu-Ningxia Region.

| **Region** | **Area km2** | **County** | **Town** | **Village** | | **Poverty-Stricken** | | | **Population** | | | **Population Density** | | |
| --- | --- | --- | --- | --- | --- | --- | --- | --- | --- | --- | --- | --- | --- | --- |
| **Number** | | **%** | **1999** | **2010** | | **1999** | | **2010** |
| Yan’an | 36,712 | 13 | 197 | 3334 | 6 | | 46 | | 193.6 | | 218.7 | 52 | 60 | |
| Yulin | 43,578 | 12 | 266 | 5844 | 10 | | 83 | | 317.8 | | 335.1 | 73 | 77 | |
| Qingyang | 27,096 | 8 | 148 | 1343 | 5 | | 63 | | 249.7 | | 221.1 | 91 | 82 | |
| South Ningxia | 30,456 | 8 | 156 | 1547 | 8 | | 100 | | 241.3 | | 208.2 | 79 | 68 | |
| Total | 137,662 | 41 | 767 | 12068 | 29 | | 71 | | 1002.4 | | 983.2 | 73 | 71 | |

Notes: the unit of population is ten thousand; the unit of population density is person/km2.

2. Basic Characteristics of Vegetation Coverage Pattern Evolution

Between 2010 and 2014, the pattern of vegetation restoration in Shaanxi-Gansu-Ningxia Region has become more apparent. The “green vegetation zone” has widened annually from southeast to northwest and the low vegetation coverage zone has gradually shrunk (Figure S1). From 2000 to 2014, the vegetation coverage of Shaanxi-Gansu-Ningxia Region has been evidently improved. High vegetation coverage zone gradually extended from the relatively high coverage zones (dark green) centered on Ziwuling (I), Huanglongshan (II), and Liupanshan (III) to the two relatively low coverage zones, namely the northern Ningnan region (IV) and the Mu Us Sandy Land (V) in northern Yulin.

Confined by meteorological conditions such as humidity and temperature, the spatial pattern of NDVI in Shaanxi-Gansu- Ningxia Region, which is high in the south and the east part and low in the north and the west part, is stable in the past 15 years. However, the pattern in 2014 is less clear than that of the period from 2000 to 2005.

3. Comparison of NDVI Growth Rates Between 2001–2002 (a), 2008–2009 (b) and 2012–2013 (c) in Shaanxi-Gansu-Ningxia Region

The ecological restoration projects have attained obvious fruits, and the impacts of human activities get more apparent. The vegetation restoration of Shaanxi-Gansu-Ningxia Region can be categorized into three stages: the first improvement (2000–2002), the second improvement (2008–2009), and the third improvement (2012–2013), with three NDVI increasing rates of 13.0%, 9.8%, and 6.3%, respectively.

Comparing the spatial patterns of these three vegetation stages, the differences mainly lie in northern Shaanxi region. The NDVI growth rate fluctuates between the range from −20% to 20%, while that of Longdong and southern Ningxia Hui Autonomous Region are smaller. In 2000–2002, the vegetation improvement of northern Shaanxi took place mainly in Yulin and northern Yan’an; in 2008–2009, the vegetation improvement happened in the hilly and gully areas of southern Yulin; and in 2012–2013, the vegetation improvement were relatively insignificant. Thus, the vegetation changes in northern Shaanxi Province are still the core area leading to the growth differences in Shaanxi-Gansu-Ningxia Region (Figure S2).


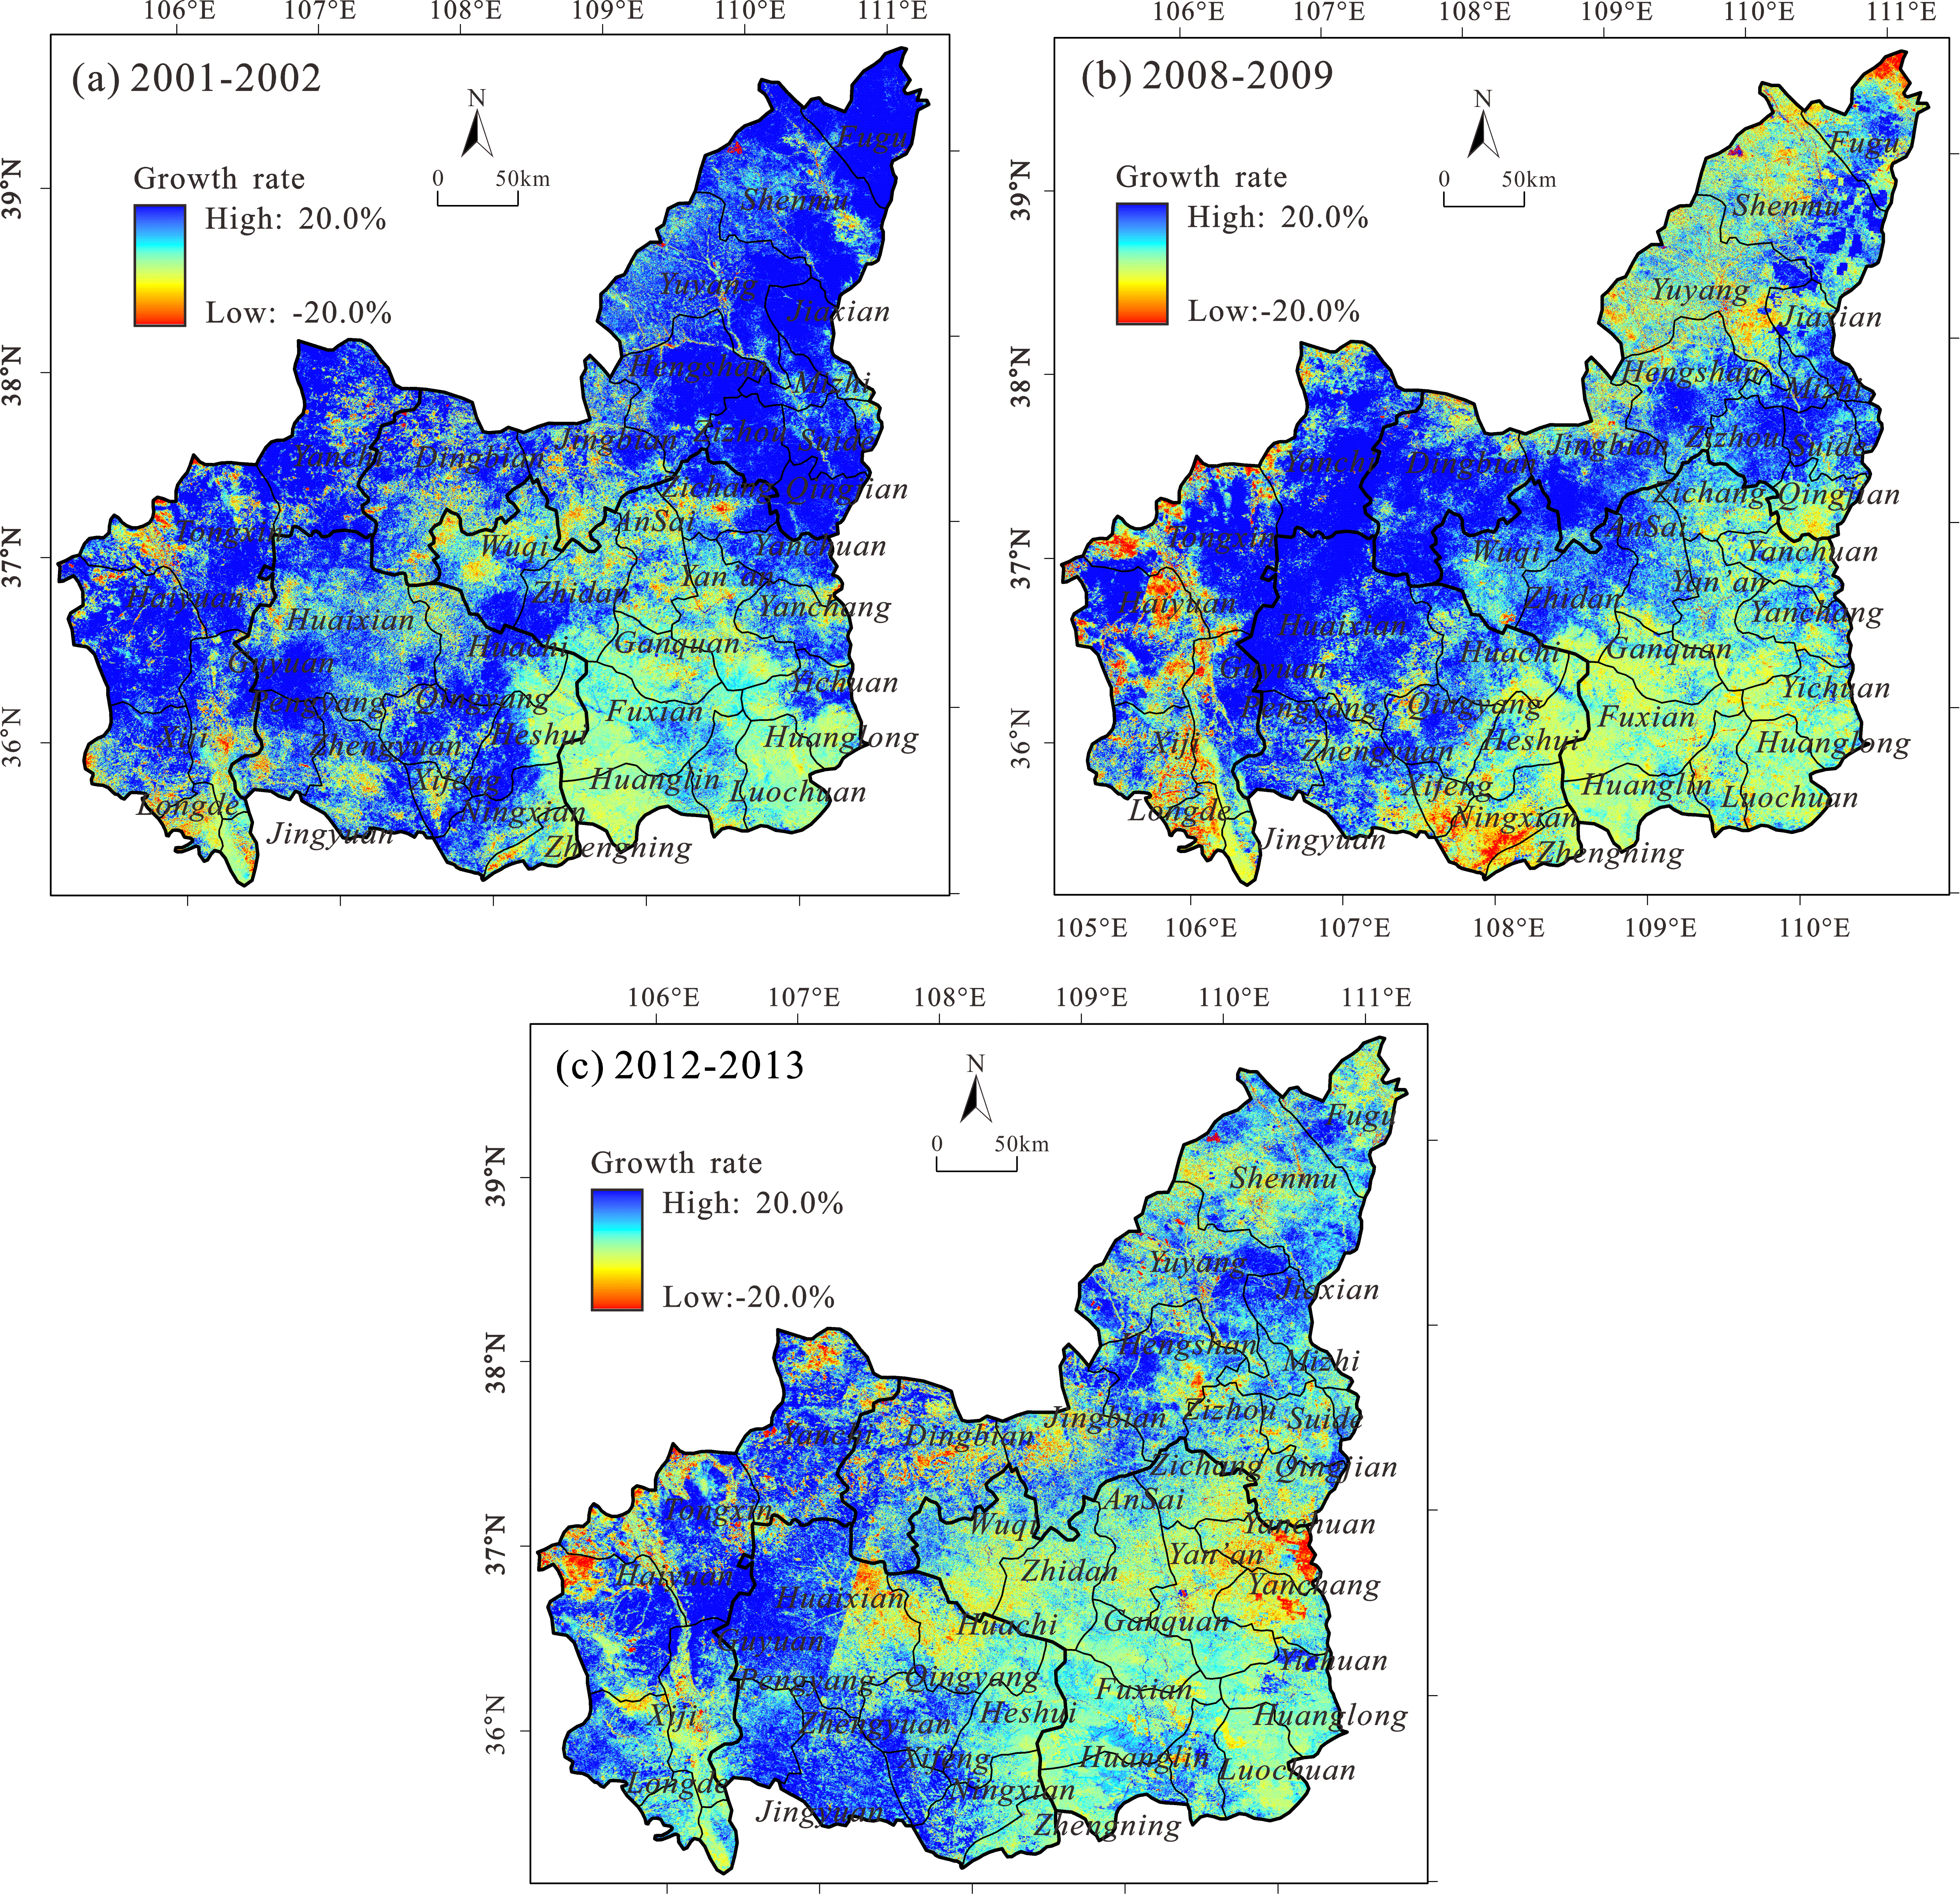


**Figure S2.** Comparison of NDVI growth rate between 2001–2002 (**a**); 2008–2009 (**b**) and 2012–2013 (**c**).

4. Impact of Industrialization on Vegetation Restoration

Mu Us Sandy Land in northern China as a typical eco-fragile region contains approximately one-third of the Chinese coal reserves (Figure S3). The region has a long history of coal mining with prolonged human-induced activities that might accompany the development of Aeolian desertification. Since China started implementing the western development policy in 2000, the mining activity has expanded rapidly in the Mu Us Sandy Land region and significantly impacted the sustainable socioeconomic development (Figure S4).

Li, *et al.* [3] highlighted that although the impact of mining activities in the study region has been confirmed from the perspectives of spatial and temporal distribution of mining regions, we should pay more attention to the fact that some crucial land cover types such as vegetation and sparse vegetation have been spoiled severely by the extension of mining activities. In the eco-fragile region, when the vital protecting vegetation coverage is reduced, wind erosion accelerates and mobile sand dunes will be formed, which contribute to the further development of Aeolian desertification.


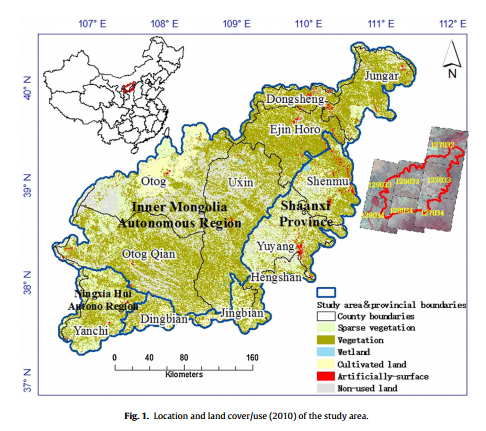


**Figure S3.** Location and land cover (2010) of the study area. (Li *et al.* 2015).


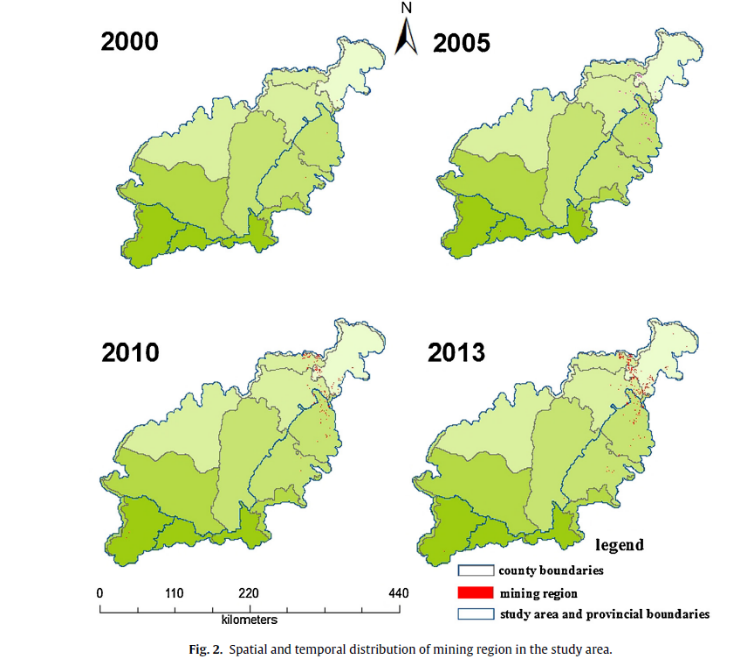


**Figure S4.** Spatial and temporal distribution of mining region in the study area. (Li *et al.* 2015).

References

1. Yan, J.P.; Yan, Y. Design and operation channels of the ecological purchase in the
   Shaanxi-Gansu-Ningxia border area. *J. Geogr. Sci.* **2002**, *57*, 343–353.
2. Li, S.S.; Yan, J.P.; Liu, X.Y.; Wan, J. Response of vegetation restoration to climate change and human activities in Shaanxi-Gansu-Ningxia region. *J. Geogr. Sci.* **2013**, *23*, 98–112.
3. Li, N.; Yan, C.Z.; Xie, J.L. Remote sensing monitoring recent rapid increase of coal mining
   activity of an important energy base in northern China, a case study of Mu Us Sandy Land.
   *Resour. Conserv. Recycl.* **2015**, *94*, 129–135.
